# Supplementary material
Source: PubMed Central journal article supplement (PMC4676521)
Supplement: supp_115.180919_FigureS1.pdf [file supp_115.180919_FigureS1.pdf]

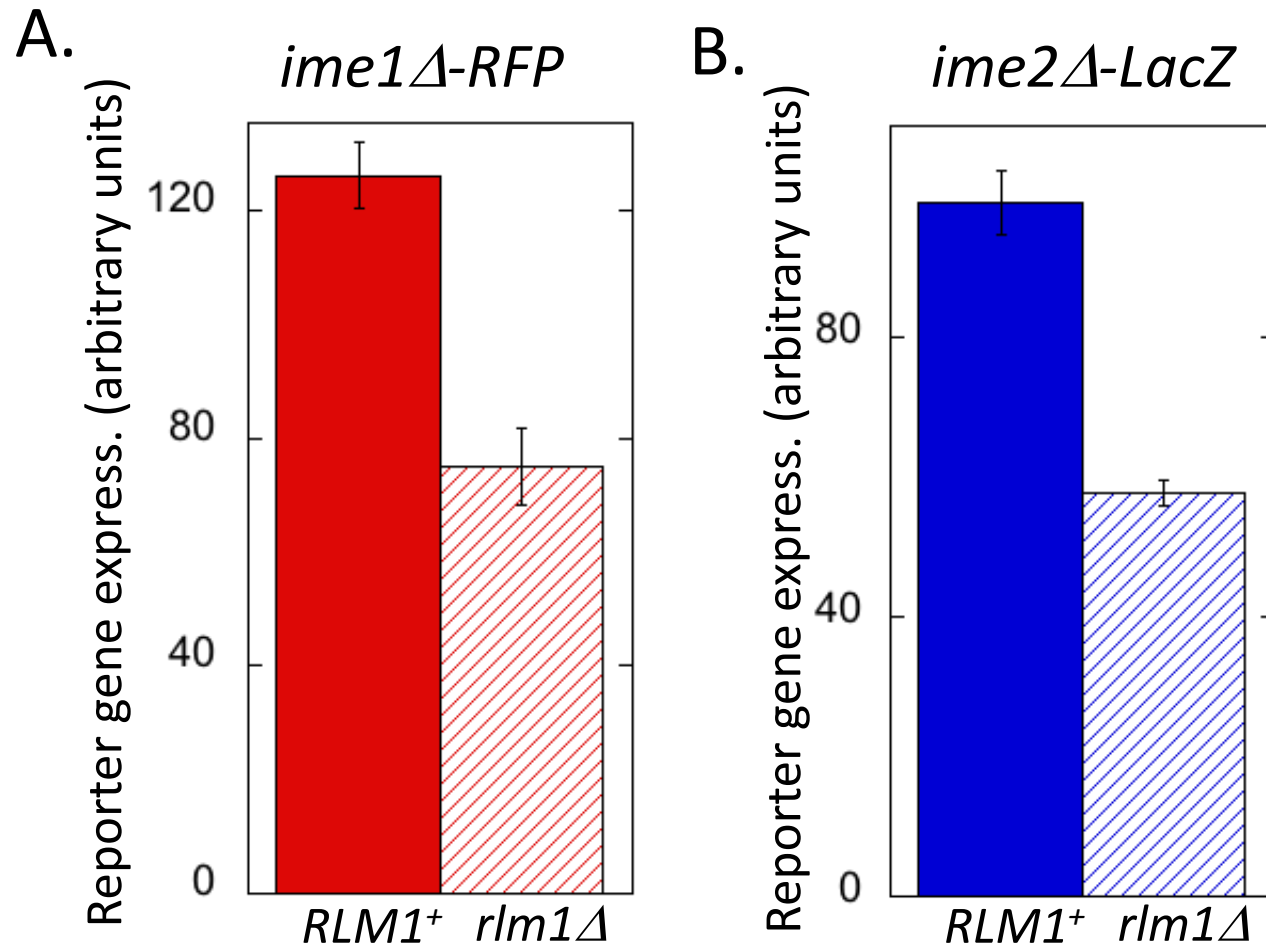

**Figure S1** *Rlm1* promotes *IME* expression and spore formation by cell non-autonomous mechanism: *rlm1D* reporter. Experiments measure reporter gene expression in chimeric colonies when signal strain is either *RLM1*<sup>+</sup> (solid bars) or *rlm1D* (hatched bars). Reporter strains are as in Fig. 4 except they are *rlm1D* rather than *RLM1*<sup>+</sup>. (A) reporter strain contains *ime1D*-RFP (SH4967, left, red; n=3). (B) reporter strain contains *ime2D*-LacZ (SH4800, right, blue, n =3).
