# Supplementary material
Source: PubMed Central journal article supplement (PMC4676521)
Supplement: supp_115.180919_FigureS2.pdf [file supp_115.180919_FigureS2.pdf]

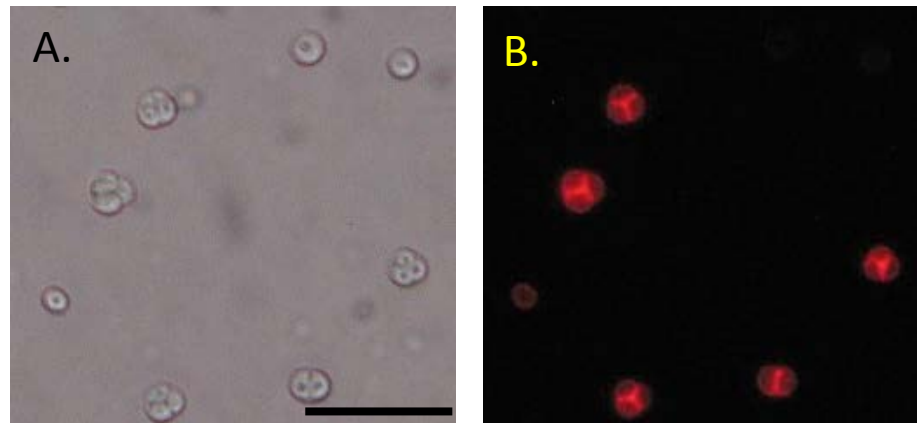

**Figure S2** *Permeability of asci during colony sporulation.* 4 d wild-type spot colonies (SH3881) were resuspended in 2M sorbitol and 10 mg/ml propidium iodide and visualized by phase contrast (A) and fluorescent microscopy (B). Scale bar = 25  $\mu$ m.
