# Supplementary material
Source: PubMed Central journal article supplement (PMC4676521)
Supplement: supp_115.180919_TableS1.pdf [file supp_115.180919_TableS1.pdf]

**Table S1 *Saccharomyces cerevisiae* strains used in this study**

| Strain         | Genotype                                                                                                                                                                                                           |                          |
|----------------|--------------------------------------------------------------------------------------------------------------------------------------------------------------------------------------------------------------------|--------------------------|
| SH1020         | <i>MATa/MATα ade2/ade2 can1:ADE2:CAN1 /can1:ADE2:CAN1 his3-11,15/his3-11,15</i><br>(1996)<br><i>leu2-3,112/LEU2 lys2(3'Δ):HIS3:lys2(5'Δ)/LYS2 trp1-1 / trp1-3'Δ ura3-1 / ura3-1</i>                                | Piccirillo et al (2010a) |
| SH2081         | <i>MATa/MATα his3Δ1/his3Δ1 leu2Δ0/leu2Δ0 ura3Δ0/ura3Δ0</i>                                                                                                                                                         | Giaever (2002)           |
| SH3825         | <i>MATa/MATα ade2/ade2 can1:ADE2:CAN1/can1:ADE2:CAN1 his3-11,15/his3-11,15</i><br><i>lys2(3'Δ):HIS3:lys2(5'Δ)/LYS2 leu2-3,112/leu2-3,112 trp1-1/trp1-3'Δ ura3-1/ URA3</i><br><i>ime2Δ-LacZ -TRP1 / ime2Δ::LEU2</i> | Piccirillo et al (2010a) |
| SH3827         | <i>MATa/MATα ade2/ade2 can1:ADE2:CAN1/can1:ADE2:CAN1 his3-11,15/his3-11,15</i><br><i>lys2(3'Δ):HIS3:lys2(5'Δ)/LYS2 leu2-3,112/leu2-3,112 TRP1/trp1-3'Δ ura3Δ::LEU2/ura3-1</i><br><i>IME1+ / ime1Δ-LacZ- URA3</i>   | Piccirillo et al (2010a) |
| SH3830         | <i>MATa/MATα ade2/ade2 can1:ADE2:CAN1/can1:ADE2:CAN1 his3-11,15/his3-11,15</i><br><i>leu2-3,112/LEU2 lys2(3'Δ):HIS3:lys2(5'Δ)/LYS2 TRP1+ / trp1-3'Δ ura3-1/ura3-1</i><br><i>ime1Δ / ime1Δ-LacZ-URA3</i>            | Piccirillo et al (2010a) |
| SH3881         | <i>MATa/MATα ade2/ade2 can1:ADE2:CAN1/can1:ADE2:CAN1 his3-11,15/his3-11,15</i><br><i>lys2(3'Δ):HIS3:lys2(5'Δ)/LYS2 URA3/ura3-1</i>                                                                                 | Piccirillo et al (2010a) |
| SH3883         | <i>MATa/MATα ade2/ade2 can1:ADE2:CAN1/can1:ADE2:CAN1 his3-11,15/his3-11,15</i><br><i>leu2-3,112/leu2-3,112 lys2(3'Δ):HIS3:lys2(5'Δ)/LYS2 URA3/ura3-1</i><br><i>ime2Δ::LEU2/ime2Δ::LEU2</i>                         | Piccirillo et al (2010a) |
| SH4324, SH4429 | <i>MATa/MATα ade2/ade2 can1:ADE2:CAN1/can1:ADE2:CAN1 his3-11,15/his3-11,15</i><br><i>lys2(3'Δ):HIS3:lys2(5'Δ)/LYS2 ura3-1/ura3-1 mpk1Δ::URA3 /mpk1Δ::URA3</i>                                                      | This study               |
| SH4414         | <i>MATa/MATα ade2/ade2 can1:ADE2:CAN1/can1:ADE2:CAN1 his3-11,15/his3-11,15</i><br><i>lys2(3'Δ):HIS3:lys2(5'Δ)/LYS2 trp1-1/TRP1 ura3-1/ura3-1 ime1Δ/ ime1Δ-RFP(mCherry)-</i><br><i>URA3</i>                         | This study               |
| SH4502, SH4503 | <i>MATa/MATα ade2/ade2 can1:ADE2:CAN1/can1:ADE2:CAN1 his3-11,15/his3-11,15</i><br><i>lys2(3'Δ):HIS3:lys2(5'Δ)/LYS2 ura3-1/ura3-1 ptp2Δ::URA3 /ptp2Δ::URA 3</i>                                                     | This study               |
| SH4708, SH4767 | <i>MATa/MATα ade2/ade2 can1:ADE2:CAN1/can1:ADE2:CAN1 his3-11,15/his3-11,15</i>                                                                                                                                     | This study               |

|                           |                                                                                               |            |
|---------------------------|-----------------------------------------------------------------------------------------------|------------|
|                           | <i>lys2(3'Δ):HIS3:lys2(5'Δ)/LYS2 ura3-1/ura3-1 rlm1Δ::URA3 /rlm1Δ::URA3</i>                   |            |
| <b>SH4770</b>             | <i>MATa/MATα ade2/ade2 can1:ADE2:CAN1/can1:ADE2:CAN1 his3-11,15/his3-11,15</i>                | This study |
|                           | <i>lys2(3'Δ):HIS3:lys2(5'Δ)/LYS2 ura3-1/ura3-1 bck1Δ::URA3 /bck1Δ::URA3</i>                   |            |
| <b>SH4783</b>             | <i>MATa/MATα ade2/ade2 can1:ADE2:CAN1/can1:ADE2:CAN1 his3-11,15/his3-11,15</i>                | This study |
|                           | <i>leu2-3,112/leu2-3,112 lys2(3'Δ):HIS3:lys2(5'Δ)/LYS2 ura3-1/ura3-1</i>                      |            |
|                           | <i>ime2Δ::LEU2/ime2Δ::LEU2 rlm1Δ::URA3 /rlm1Δ::URA3</i>                                       |            |
| <b>SH4789</b>             | <i>MATa/MATα ade2/ade2 can1:ADE2:CAN1/can1:ADE2:CAN1 his3-11,15/his3-11,15</i>                | This study |
|                           | <i>leu2-3,112/LEU2+lys2(3'Δ):HIS3:lys2(5'Δ)/LYS2 trp1-1/TRP1+ ura3-1/ura3-1</i>               |            |
|                           | <i>ime2::GFP-TRP1/IME2+ rlm1Δ::URA3 /rlm1Δ::URA3</i>                                          |            |
| <b>SH4793<sup>1</sup></b> | <i>MATa/MATα ade2/ade2 can1:ADE2:CAN1/can1:ADE2:CAN1 his3-11,15/his3-11,15</i>                | This study |
|                           | <i>leu2-3,112/LEU2lys2(3'Δ):HIS3:lys2(5'Δ)/LYS2 trp1-1/ trp1-3'Δ ura3-1/ura3-1</i>            |            |
|                           | <i>ime2::GFP-TRP1/ime2::GFP-TRP1 rlm1Δ::URA3/RLM1</i>                                         |            |
| <b>SH4799</b>             | <i>MATa/MATα ade2/ade2 can1:ADE2:CAN1/can1:ADE2:CAN1 his3-11,15/ his3-11,15</i>               | This study |
|                           | <i>LEU2+/leu2-3,112 lys2(3'Δ):HIS3:lys2(5'Δ)/LYS2 leu2-3,112/LEU2+ ura3-1/ura3-1</i>          |            |
|                           | <i>TRP1/trp1-3'Δ rlm1Δ::URA3 /rlm1Δ::LEU2 IME1+/ ime1Δ-LacZ (URA3)</i>                        |            |
| <b>SH4800</b>             | <i>MATa/MATα ade2/ade2 can1:ADE2:CAN1/can1:ADE2:CAN1 his3-11,15/his3-11,15</i>                | This study |
|                           | <i>leu2-3,112/leu2-3,112 lys2(3'Δ):HIS3:lys2(5'Δ)/LYS2 TRP1/trp1-3'Δ ura3-1/ura3-1 ime1Δ/</i> |            |
|                           | <i>ime1Δ-LacZ (URA3) rlm1Δ::LEU2 /rlm1Δ::LEU2</i>                                             |            |
| <b>SH4805, SH5071</b>     | <i>MATa/MATα ade2/ade2 can1:ADE2:CAN1/can1:ADE2:CAN1 his3-11,15/his3-11,15</i>                | This study |
|                           | <i>leu2-3,112/leu2-3,112 lys2(3'Δ):HIS3:lys2(5'Δ)/LYS2 TRP1/trp1-3'Δ URA3/ura3-1</i>          |            |
|                           | <i>ime2Δ::LEU2/ime2Δ-GFP-TRP</i>                                                              |            |
| <b>SH4835, SH4836</b>     | <i>MATa/MATα ade2/ade2 can1:ADE2:CAN1 /can1:ADE2:CAN1 his3-11,15/his3-11,15 leu2-</i>         | This study |
|                           | <i>3,112/ leu2-3,112 lys2(3'Δ):HIS3:lys2(5'Δ)/LYS2 trp1-1 / trp1-3'Δ ura3-1 / ura3-1</i>      |            |
|                           | <i>rlm1Δ::LEU2 /rlm1Δ::LEU2</i>                                                               |            |
| <b>SH4838, SH5146</b>     | SH1020 containing pS778 (2XUAS <sup>Rlm1</sup> -CYC1pr-LacZ-URA3-Amp <sup>R</sup> )           | This study |
| <b>SH4839</b>             | SH1020 containing pS779 (CYC1pr-LacZ-URA3-Amp <sup>R</sup> )                                  | This study |
| <b>SH4848, SH4850</b>     | SH4835 or SH4836 containing pS778 (2XUAS <sup>Rlm1</sup> -CYC1pr-LacZ-URA3-Amp <sup>R</sup> ) | This study |
| <b>SH4924</b>             | <i>MATa/MATα ade2/ade2 can1:ADE2:CAN1 /can1:ADE2:CAN1 his3-11,15/his3-11,15</i>               | This study |
|                           | (1996)                                                                                        |            |
|                           | <i>leu2-3,112/LEU2 lys2(3'Δ):HIS3:lys2(5'Δ)/LYS2 trp1-1 / trp1-3'Δ ura3-1 / ura3-1</i>        |            |

|                           | <i>ime1Δ-LacZ (URA3)/ime1Δ</i>                                                                                                                                                                                                   |            |
|---------------------------|----------------------------------------------------------------------------------------------------------------------------------------------------------------------------------------------------------------------------------|------------|
| <b>SH4954<sup>2</sup></b> | <i>MATa/MATα ade2/ade2 can1:ADE2:CAN1/can1:ADE2:CAN1 his3-11,15/his3-11,15 lys2(3'Δ):HIS3:lys2(5'Δ)/LYS2 leu2-3,112/leu2-3,11 trp1-1/trp1-3'del ura3-1/ura3-1 ime2::GFP-TRP1/ime2::GFP-TRP1 rlm1Δ::URA/rlm1 Δ::URA</i>           | This study |
| <b>SH4967, SH4968</b>     | <i>MATa/MATα ade2/ade2 can1:ADE2:CAN1/can1:ADE2:CAN1 his3-11,15/his3-11,15 leu2-3,112/leu2-3,112 lys2(3'Δ):HIS3:lys2(5'Δ)/LYS2 trp1-1/TRP1 ura3-1/ura3-1 ime1Δ/ime1Δ-RFP(Cherry)-URA3 rlm1Δ::LEU2 /rlm1Δ::LEU2</i>               | This study |
| <b>SH5065</b>             | <i>MATa/MATα ade2/ade2 can1:ADE2:CAN1/can1:ADE2:CAN1 his3-11,15/his3-11,15 leu2-3,112/leu2-3,112 lys2(3'Δ):HIS3:lys2(5'Δ)/LYS2 trp1-1/trp1-3'Δ ura3-1/ura3-1 ime2Δ::LEU2/ime2Δ-GFP-TRP pS778 (UAS<sub>Rim1</sub>-LacZ-URA3)</i>  | This study |
| <b>SH5067</b>             | <i>MATa/MATα ade2/ade2 can1:ADE2:CAN1/can1:ADE2:CAN1 his3-11,15/his3-11,15 leu2-3,112/leu2-3,112 lys2(3'Δ):HIS3:lys2(5'Δ)/LYS2 trp1-1/trp1-3'Δ ura3-1/ura3-1 ime2Δ::LEU2/ime2Δ-GFP-TRP pS779 (uasΔ-LacZ-URA3)</i>                | This study |
| <b>SH5071</b>             | <i>MATa/MATα ade2/ade2 can1:ADE2:CAN1/can1:ADE2:CAN1 his3-11,15/his3-11,15 leu2-3,112/leu2-3,112 lys2(3'Δ):HIS3:lys2(5'Δ)/LYS2 TRP1<sup>+</sup>/trp1-3'Δ URA3<sup>+</sup>/ura3-1 ime2Δ::LEU2/ime2Δ-GFP-TRP1</i>                  | This study |
| <b>SH5072, SH4790</b>     | <i>MATa/MATα ade2/ade2 can1:ADE2:CAN1/can1:ADE2:CAN1 his3-11,15/his3-11,15 leu2-3,112/leu2-3,112 lys2(3'Δ):HIS3:lys2(5'Δ)/LYS2 trp1-1 / TRP1<sup>+</sup> ura3-1 / ura3-1 ime2Δ-GFP-TRP1 / ime2Δ::LEU2 rlm1Δ::URA/rlm1 Δ::URA</i> | This study |
| <b>SH5073, SH5077</b>     | <i>MATa/MATα ade2/ade2 can1:ADE2:CAN1/can1:ADE2:CAN1 his3-11,15/his3-11,15 lys2(3'Δ):HIS3:lys2(5'Δ)/LYS2 ura3-1/ura3-1 pIME1 (pS201, 2μ-IME1-URA3)</i>                                                                           | This study |
| <b>SH5074, SH5078</b>     | <i>MATa/MATα ade2/ade2 can1:ADE2:CAN1/can1:ADE2:CAN1 his3-11,15/his3-11,15 lys2(3'Δ):HIS3:lys2(5'Δ)/LYS2 ura3-1/ura3-1 pS632 (URA3 vector)</i>                                                                                   | This study |
| <b>SH5085, SH5149</b>     | <i>MATa/MATα ade2/ade2 can1:ADE2:CAN1/can1:ADE2:CAN1 his3-11,15/his3-11,15 leu2-3,112/leu2-3,112 lys2(3'Δ):HIS3:lys2(5'Δ)/LYS2 ura3-1/ura3-1 rlm1Δ::LEU2 /rlm1Δ::LEU2 pIME1 (pS201, 2μ-IME1-URA3)</i>                            | This study |
| <b>SH5094, SH5150</b>     | <i>MATa/MATα ade2/ade2 can1:ADE2:CAN1/can1:ADE2:CAN1 his3-11,15/his3-11,15 leu2-3,112/leu2-3,112 lys2(3'Δ):HIS3:lys2(5'Δ)/LYS2 ura3-1/ura3-1 rlm1Δ::LEU2 /rlm1Δ::LEU2 pS632 (URA3 vector)</i>                                    | This study |
| <b>SH5105</b>             | <i>MATa/MATα ade2/ade2 can1:ADE2:CAN1/can1:ADE2:CAN1 his3-11,15/his3-11,15 LEU2<sup>+</sup>/leu2-3,112 lys2(3'Δ):HIS3:lys2(5'Δ)/LYS2 trp1-1/trp1-3'Δ ura3-1/URA3</i>                                                             | This study |

---

|                       |                                                                                                                                                                                                                                                                 |            |
|-----------------------|-----------------------------------------------------------------------------------------------------------------------------------------------------------------------------------------------------------------------------------------------------------------|------------|
|                       | <i>ime2Δ::GFP-TRP1/IME2+</i>                                                                                                                                                                                                                                    |            |
| <b>SH5276, SH5306</b> | <i>MATa/MATα ade2/ade2 can1:ADE2:CAN1/can1:ADE2:CAN1 his3-11,15/his3-11,15<br/>leu2-3,112/ leu2-3,112 lys2(3'Δ):HIS3:lys2(5'Δ)/LYS2 trp1-1/ trp1-3'Δ ura3-1/ura3-1<br/>ime2::GFP-TRP1/ime2::GFP-TRP1 rlm1Δ::URA3/rlm1Δ::URA3 YEp351 (LEU2)</i>                  | This study |
| <b>SH5278, SH5304</b> | <i>MATa/MATα ade2/ade2 can1:ADE2:CAN1/can1:ADE2:CAN1 his3-11,15/his3-11,15<br/>leu2-3,112/ leu2-3,112 lys2(3'Δ):HIS3:lys2(5'Δ)/LYS2 trp1-1/ trp1-3'Δ ura3-1/ura3-1<br/>ime2::GFP-TRP1/ime2::GFP-TRP1 rlm1Δ::URA3/ rlm1Δ::URA3 pS303 (YEp351-IME1-<br/>LEU2)</i> | This study |
| <b>SH5280</b>         | <i>MATa/MATα ade2/ade2 can1:ADE2:CAN1/can1:ADE2:CAN1 his3-11,15/his3-11,15<br/>leu2-3,112/ leu2-3,112 lys2(3'Δ):HIS3:lys2(5'Δ)/LYS2 trp1-1/ trp1-3'Δ ura3-1/ura3-1<br/>ime2::GFP-TRP1/ime2::GFP-TRP1 rlm1Δ::URA3/RLM1 YEp351 (LEU2)</i>                         | This study |
| <b>SH5282</b>         | <i>MATa/MATα ade2/ade2 can1:ADE2:CAN1/can1:ADE2:CAN1 his3-11,15/his3-11,15<br/>leu2-3,112/ leu2-3,112lys2(3'Δ):HIS3:lys2(5'Δ)/LYS2 trp1-1/ trp1-3'Δ ura3-1/ura3-1<br/>ime2::GFP-TRP1/ime2::GFP-TRP1 rlm1Δ::URA3/ RLM1 pS303 (YEp351-IME1-LEU2)</i>              | This study |

---

<sup>1</sup> SH4793 used as an independent isolate of the *RLM1<sup>+</sup> ime2<sup>□</sup>-GFP* strain used in Fig. 2B, except that SH4793 is an *RLM1 / rlm1<sup>□</sup>* heterozygote and is homozygous for the fusion allele

<sup>2</sup> SH4954 used as an independent isolate of the *rlm1<sup>□</sup> ime2<sup>□</sup>-GFP* strain used in Fig. 2B, except that SH4954 is homozygous for the fusion allele
