# Supplementary material
Source: PubMed Central journal article supplement (PMC4676521)
Supplement: supp_115.180919_TableS2.pdf [file supp_115.180919_TableS2.pdf]

**Table S2 Sporulation and Viability of CWI mutants**

| <i>Genotype</i> | % Spore Formation |                |
|-----------------|-------------------|----------------|
|                 | Colonies          | Cultures       |
| <i>WT</i>       | 21.8 ± 2.3 (4)    | 17.5 ± 3.7 (4) |
| <i>ade1Δ</i>    | 0.0 ± 0.0 (3)     | 10.6 ± 3.9 (4) |
| <i>bck1Δ</i>    | 2.5 ± 0.5 (3)     | 9.6 ± 1.2 (4)  |
| <i>mpk1Δ</i>    | 2.4 ± 0.5 (3)     | 10.3 ± 1.5 (4) |
| <i>opi8Δ</i>    | 0.7 ± 0.4 (3)     | 8.2 ± 1.2 (4)  |
| <i>rtg1Δ</i>    | 0.0 ± 0.0 (3)     | 10.2 ± 1.8 (4) |
| <i>smi1Δ</i>    | 0.0 ± 0.0 (3)     | 17.8 ± 2.5 (4) |
| <i>yml090wΔ</i> | 0.0 ± 0.0 (3)     | 22.2 ± 1.7 (4) |
