# Supplementary material
Source: PubMed Central journal article supplement (PMC4676521)
Supplement: supp_115.180919_TableS3.pdf [file supp_115.180919_TableS3.pdf]

**Table S3 Sporulation and Viability of CWI mutants**

| Biol. Function   | <i>Genotype</i> | % Spore Formation     |                       | Colony Viability <sup>c</sup> |
|------------------|-----------------|-----------------------|-----------------------|-------------------------------|
|                  |                 | Colonies <sup>a</sup> | Cultures <sup>b</sup> |                               |
|                  | <i>WT</i>       | 27.0 ± 0.7 (4)        | 11.2 ± 1.3 (4)        | 35.8 ± 3.4 (4)                |
| Receptor         | <i>wsc1Δ</i>    | 0.0 ± 0.0 (3)         | 7.6 ± 0.9 (4)         | 17.7 ± 3.7 (3)                |
|                  | <i>wsc2Δ</i>    | 30.3 ± 2.8 (3)        | n.d.                  | 24.6 ± 3.8 (4)                |
|                  | <i>wsc3Δ</i>    | 33.9 ± 2.8 (3)        | n.d.                  | 51.2 ± 12.3 (4)               |
|                  | <i>mtl1Δ</i>    | 35.1 ± 1.4 (3)        | n.d.                  | 76.9 ± 8.8 (3)                |
|                  | <i>mid2Δ</i>    | 22.8 ± 1.8 (3)        | n.d.                  | 60.7 ± 0.9 (3)                |
| ISP <sup>d</sup> | <i>tus1Δ</i>    | 2.3 ± 0.2 (3)         | 7.3 ± 2.5 (4)         | 44.4 ± 2.3 (3)                |
|                  | <i>bck1Δ</i>    | 1.7 ± 0.2 (3)         | 8.6 ± 2.4 (4)         | 5.4 ± 1.4 (3)                 |
|                  | <i>mtl1Δ</i>    | 0.0 ± 0.0 (3)         | 7.8 ± 1.3 (4)         | 19.0 ± 4.0 (3)                |
| Target TF        | <i>rlm1Δ</i>    | 8.5 ± 0.1 (3)         | 25.4 ± 1.6 (4)        | 20.9 ± 1.6 (3)                |
|                  | <i>skn7Δ</i>    | 39.2 ± 1.8 (3)        | n.d.                  | 63.7 ± 1.7 (3)                |
|                  | <i>swi4Δ</i>    | 0.2 ± 0.2 (3)         | 0.0 ± 0.0 (4)         | 57.7 ± 4.4 (3)                |
|                  | <i>swi6Δ</i>    | 0.5 ± 0.1 (3)         | 0.0 ± 0.0 (4)         | 22.5 ± 2.6 (3)                |

Data is mean ± SEM, number of trials in parenthesis. n.d. = not determined.

<sup>a</sup> Approximately 1000 cells were spread / SPO plate. After incubation for 10 days, colonies were scraped from plates, and the fraction of cells forming asci determined by light microscopy.

<sup>b</sup> Cultures incubated in 25-well microtiter plates as Methods. After incubation of 10 days, the fraction of cells forming asci determined by light microscopy.

<sup>c</sup> Colonies grown as above were scraped from plates into 1 M sorbitol solution, and 500 cells plated on YPD medium. The viability was calculated from the fraction of these cells forming visible colonies after incubation for 3 d.
